# Supplementary material for: Synthesis, characterization, and anticancer potential of pyrene-appended Schiff base tin(iv) complexes: experimental and computational insights
Source: Royal Society of Chemistry journal article supplement (doi:10.1039/d3nj04401g), 2023-12-12
Supplement: d3nj04401g1.pdf [file d3nj04401g1.pdf]

## Electronic Supplementary Information

### Synthesis, Characterization, and Anticancer Potential of Pyrene-Appended Schiff Base Tin(IV) Complexes: Experimental and Computational Insights

Anup Paul,<sup>\*,a,1</sup> Rais Ahmad Khan,<sup>b,1</sup> Gouse M. Shaik,<sup>c</sup> Jilani. P. Shaik,<sup>c</sup> Dmytro S. Nesterov,<sup>a</sup> M. Fátima C. Guedes da Silva,<sup>a,c</sup> Armando J. L. Pombeiro<sup>a</sup>

<sup>a</sup>*Centro de Química Estrutura, Institute of Molecular Sciences, Instituto Superior Técnico, Universidade de Lisboa, Av. Rovisco Pais, 1049-001 Lisboa. Portugal.*

<sup>b</sup>*Department of Chemistry, King Saud University, Riyadh-11451, KSA*

<sup>c</sup>*Department of Biochemistry, King Saud University, Riyadh-11451, KSA*

<sup>d</sup>*Departamento de Engenharia Química, Instituto Superior Técnico, Universidade de Lisboa, Av. Rovisco Pais, 1049-001 Lisboa. Portugal*

---

**\*Corresponding authors**, E-mail: [anuppaul@tecnico.ulisboa.pt](mailto:anuppaul@tecnico.ulisboa.pt)

<sup>1</sup>*Authors contributed equally.*

### Contents:

**Figure S1.**: FT-IR spectra of **1** and **2**.

**Figure S2.** <sup>1</sup>H-NMR spectrum of **1** recorded in CDCl<sub>3</sub>.

**Figure S3.** <sup>1</sup>H-NMR spectrum of **2** recorded in CDCl<sub>3</sub>.

**Figure S4.** <sup>13</sup>C-NMR spectrum of **1** recorded in CDCl<sub>3</sub>.

**Figure S5.** <sup>13</sup>C-NMR spectrum of **2** recorded in CDCl<sub>3</sub>.

**Figure S6.** <sup>119</sup>Sn-NMR spectrum of **1** recorded in CDCl<sub>3</sub>.

**Figure S7.** <sup>119</sup>Sn-NMR spectrum of **2** recorded in CDCl<sub>3</sub>.

**Figure S8.** ESI-MS spectrum of **1** recorded in MeOH.

**Figure S9.** ESI-MS spectrum of **2** recorded in MeOH.

**Figure S10.** Plot for calculating intrinsic binding constant (a) **1** and (b) **2**.

**Figure S11.** Stern-Volmer plots of (a) **1** and (b) **2** and the Van't Hoff plot of (c) **1** and (d) **2**, respectively.

**Figure S12.** Absorption spectra at 0, 24 and 48h of the complexes **1** and **2** in buffer solution.

**Figure S13.** 2D plots of the Laplacian of the electron density,  $\Delta^2\rho(r)$  (top), and RDG function for the same projection (bottom), showing the non-covalent contacts between aromatic H atoms of phenyl groups and uncoordinated O atom in **2**.

**Table S1.** Crystallographic data and structure refinement details for **1**.

**Table S2.** Cartesian coordinates of the structure **1** optimized at the B3LYP/ZORA-def2-TZVP(SARC-ZORA-TZVP) level in water (C-PCM model).

**Table S3.** Cartesian coordinates of the structure **2** optimized at the B3LYP/ZORA-def2-TZVP(SARC-ZORA-TZVP) level in water (C-PCM model).

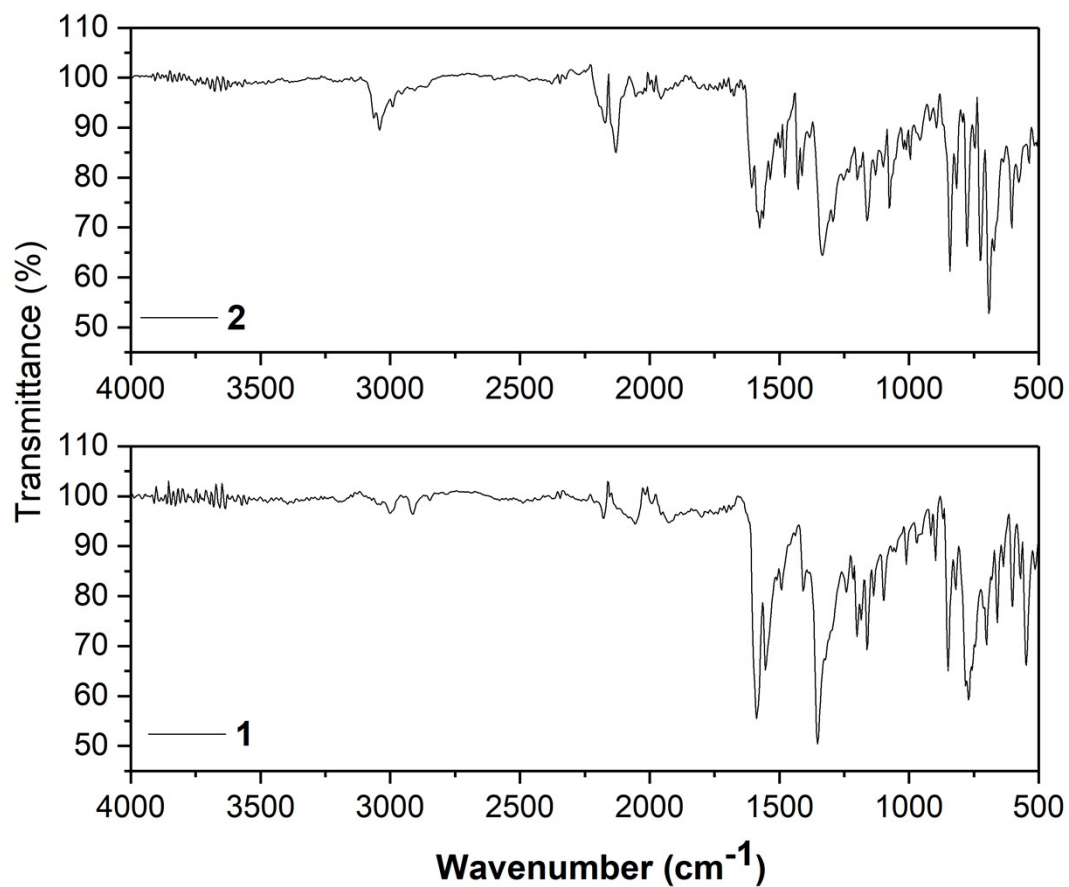

Figure S1: FT-IR spectra of 1 and 2.

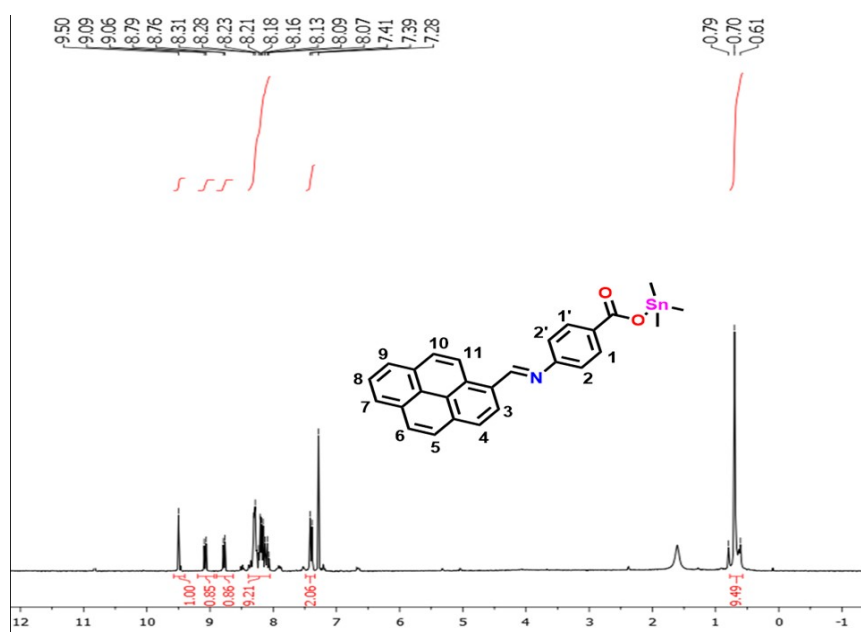

Figure S2.  $^1\text{H-NMR}$  spectrum of 1 recorded in  $\text{CDCl}_3$ .

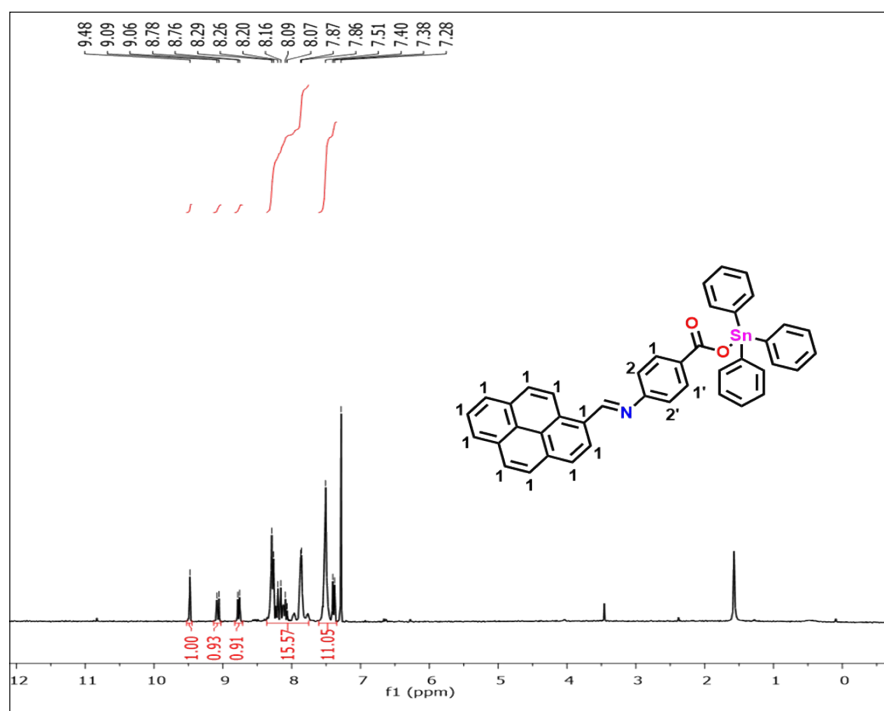

**Figure S3.**  $^1\text{H-NMR}$  spectrum of **2** recorded in  $\text{CDCl}_3$ .

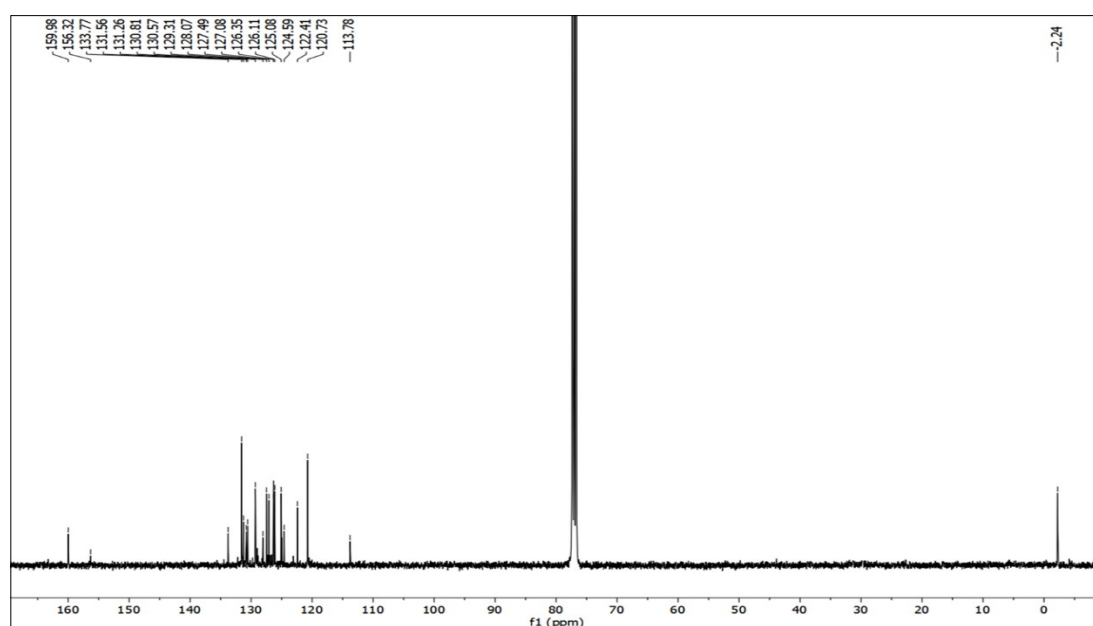

**Figure S4.**  $^{13}\text{C-NMR}$  spectrum of **1** recorded in  $\text{CDCl}_3$ .

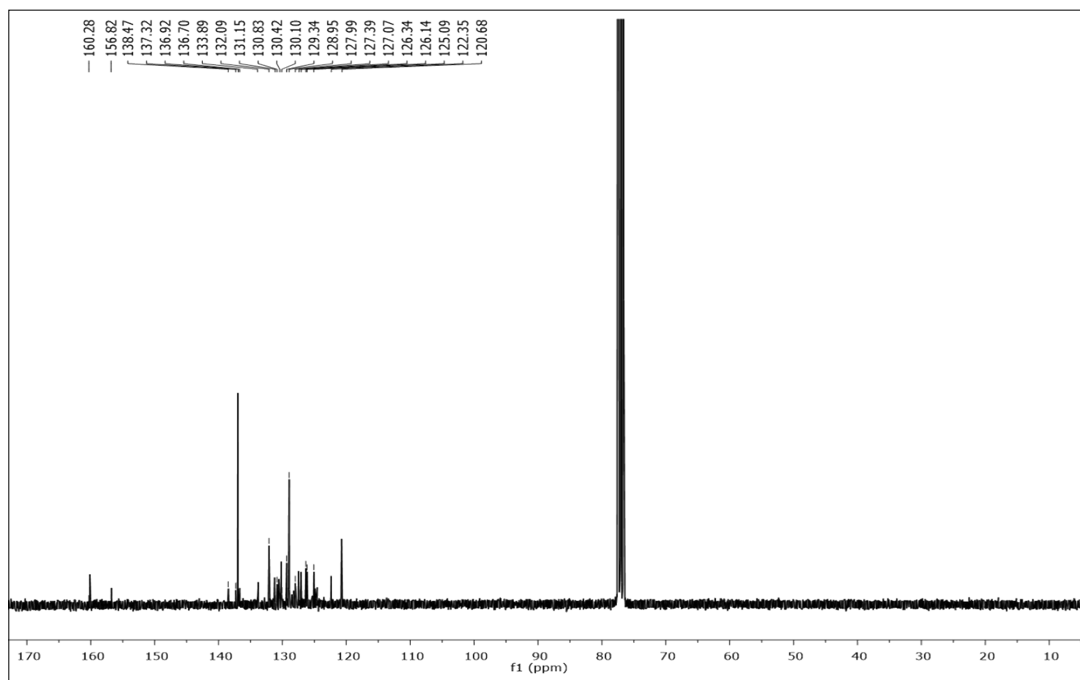

**Figure S5.**  $^{13}\text{C}$ -NMR spectrum of **2** recorded in  $\text{CDCl}_3$ .

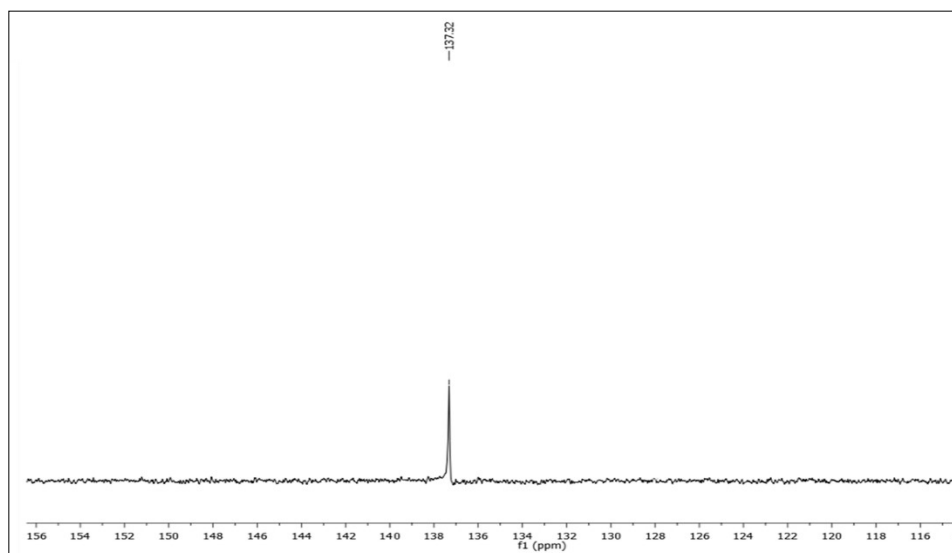

**Figure S6.**  $^{119}\text{Sn}$ -NMR spectrum of **1** recorded in  $\text{CDCl}_3$ .

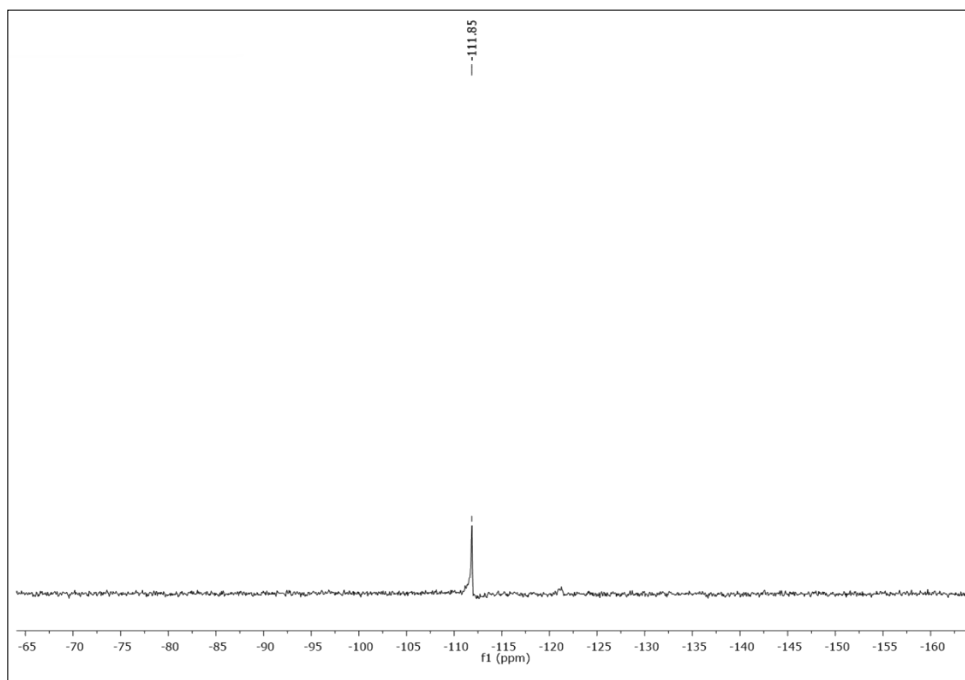

Figure S7.  $^{119}\text{Sn}$ -NMR spectrum of **2** recorded in  $\text{CDCl}_3$ .

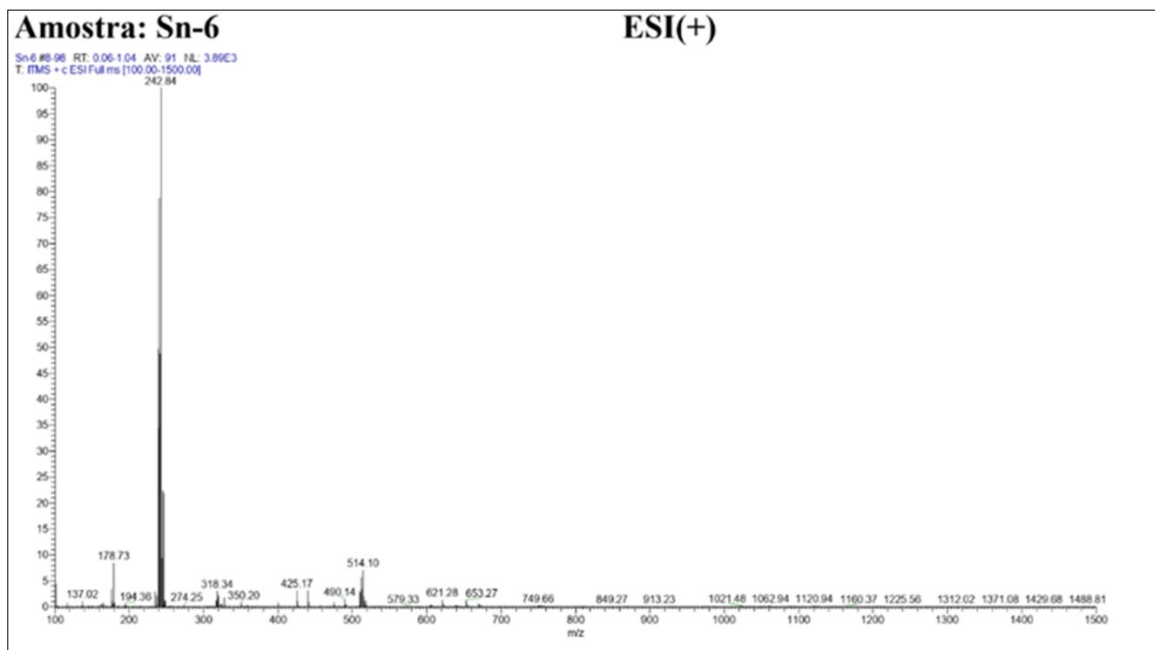

Figure S8. ESI-MS spectrum of **1** recorded in MeOH.

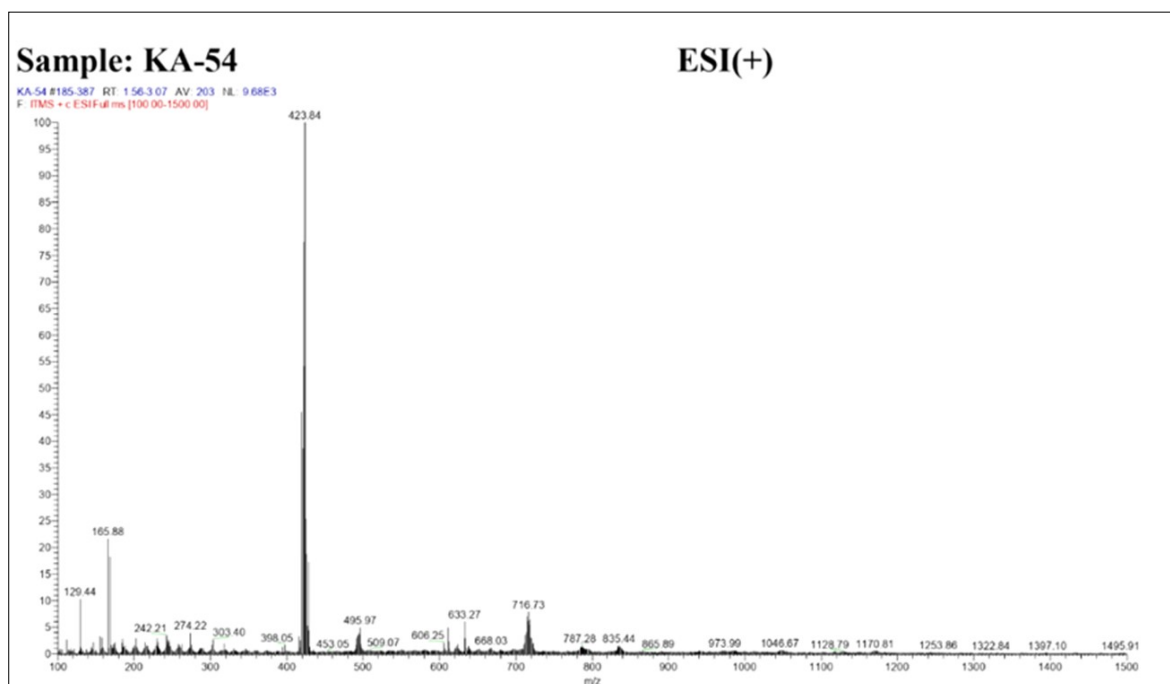

**Figure S9.** ESI-MS spectrum of **2** recorded in MeOH.

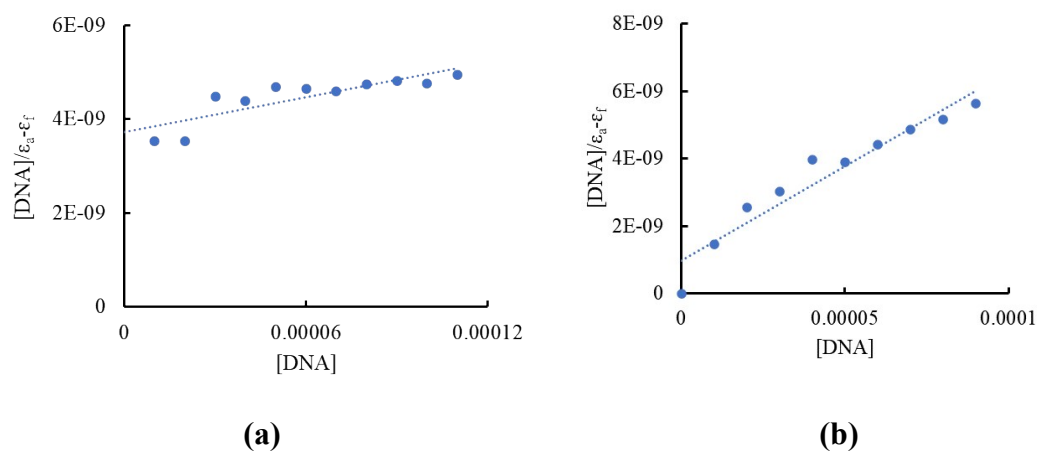

**Figure S10.** Plot for calculating intrinsic binding constant (a) **1** and (b) **2**.

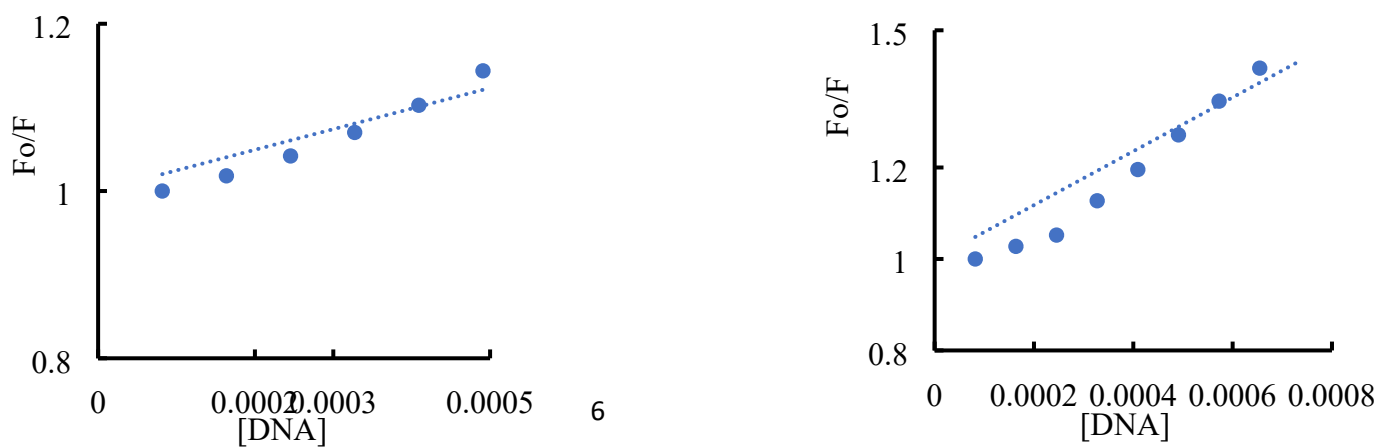

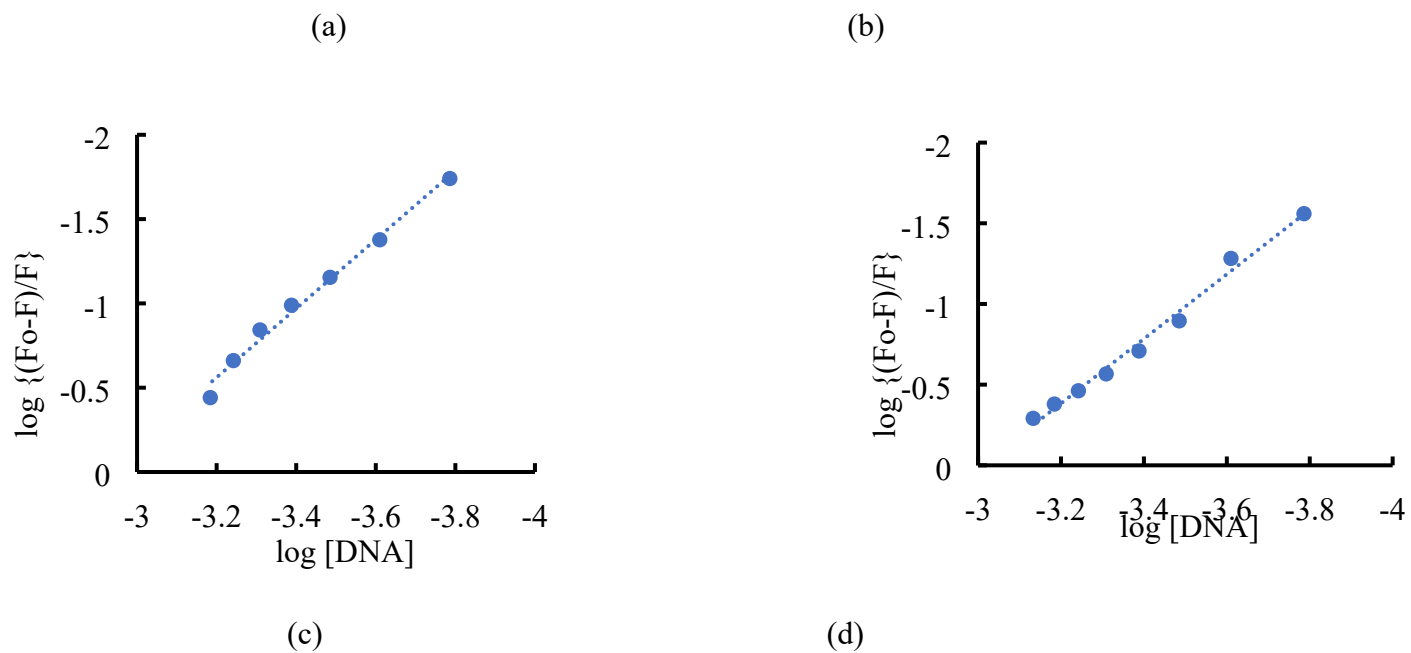

**Figure S11.** Stern-Volmer plots of (a) **1** and (b) **2** and the Van't Hoff plot of (c) **1** and (d) **2**, respectively.

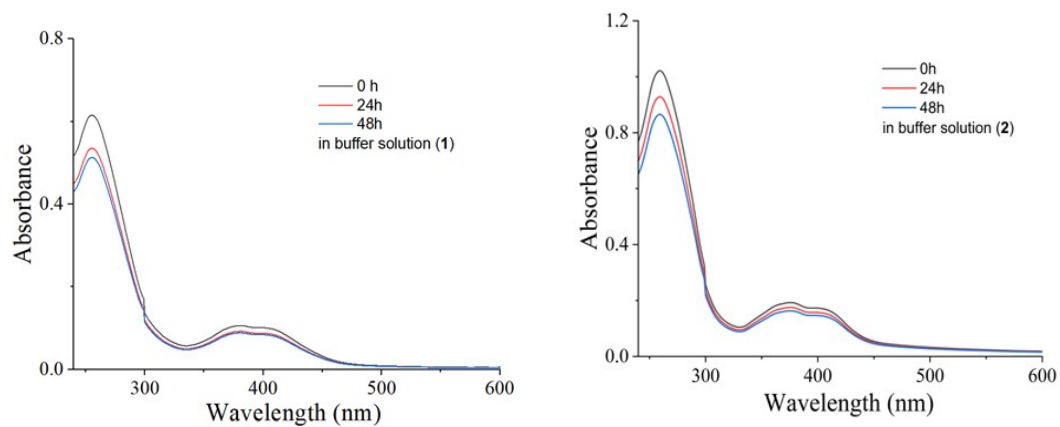

**Figure S12.** Absorption spectra at 0, 24 and 48h of the complexes **1** and **2** in buffer solution.

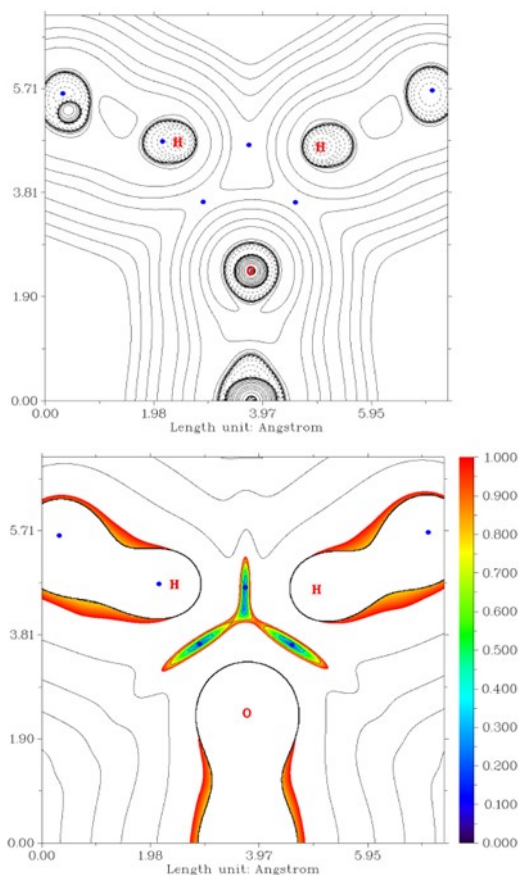

**Figure S13.** 2D plots of the Laplacian of the electron density,  $\Delta^2\rho(r)$  (top), and RDG function for the same projection (bottom), showing the non-covalent contacts between aromatic H atoms of phenyl groups and uncoordinated O atom in **2**.

**Table S1.** Crystallographic data and structure refinement details for **1**.

| <b>1</b>          |                                                    |                                           |             |
|-------------------|----------------------------------------------------|-------------------------------------------|-------------|
| Empirical formula | C <sub>27</sub> H <sub>23</sub> NO <sub>2</sub> Sn | Z                                         | 4           |
| Formula weight    | 512.15                                             | $\rho_{\text{calc}}$ (g/cm <sup>3</sup> ) | 1.512       |
| Crystal system    | monoclinic                                         | F000                                      | 1032        |
| Space group       | P2 <sub>1</sub> /c                                 | $\mu$ (mm <sup>-1</sup> )                 | 1.159       |
| <i>a</i> (Å)      | 18.047(3)                                          | Rfl. measured                             | 25689       |
| <i>b</i> (Å)      | 10.1048(14)                                        | Obs/Unique rfl.                           | 4521 / 3001 |
| <i>c</i> (Å)      | 12.5842(18)                                        | N° parameters                             | 280         |
| $\alpha$ (°)      | 90                                                 | R <sub>int</sub>                          | 0.1547      |
| $\beta$ (°)       | 101.298(5)                                         | R(F) (I ≥ 2σ(I))                          | 0.0974      |



|                    |           |                                 |        |
|--------------------|-----------|---------------------------------|--------|
| $\gamma(^{\circ})$ | 90        | wR (F <sup>2</sup> ) (all data) | 0.2719 |
| $V(\text{\AA}^3)$  | 2250.4(6) | GOF (F <sup>2</sup> )           | 1.018  |

**Table S2.** Cartesian coordinates of the structure 1 optimized at the B3LYP/ZORA-def2-TZVP(SARC-ZORA-TZVP) level in water (C-PCM model).

C -4.71183107579443 4.47900925554081 -0.16180354291365  
 C -5.46183710424509 5.67035557657268 -0.39321811590198  
 C -4.95877575322328 6.67773614803773 -1.26058424334500  
 C -3.71577949748333 6.48546119808563 -1.87954064296901  
 C -2.99137421930400 5.33631169209569 -1.65647494137367  
 C -6.71807918523248 5.86508371382099 0.24388420254655  
 C -7.46564015576585 7.05181247305169 0.00801998453381  
 C -6.93018736831223 8.04039051084257 -0.87533634843934  
 C -5.72979347155122 7.86025406435148 -1.48137255208137  
 C -5.26234998135099 3.50754954704272 0.73798724587614  
 C -6.46049204089076 3.69723956657178 1.34503856184785  
 C -7.23467826985931 4.87647951380069 1.12200302065406  
 C -8.47151812258959 5.08497402960204 1.74110997315778  
 C -9.19532128950984 6.24590836052011 1.50278932729843  
 C -8.69981227132154 7.21985170270828 0.64627920615526  
 C -2.66531105877944 3.11336807343076 -0.64061384745475  
 N -1.45279544234698 3.02423236926029 -1.04211053869452  
 C -0.78065049211448 1.80483615201486 -0.93199359120857  
 C 0.55829672781782 1.81578676112140 -0.52130287214278  
 C 1.26653090871457 0.63317376476974 -0.40645528217338  
 C 0.66881061971427 -0.58764194411332 -0.73441328481617  
 C -0.65605509231515 -0.59582412600459 -1.17467161009123  
 C -1.37783256269913 0.58147088020299 -1.26923101015668

C 1.41652664601867 -1.87099025014816 -0.63874644498123  
O 0.93197821269502 -2.93967177199539 -1.01326656019328  
O 2.61842894965615 -1.78586788908080 -0.12789990579303  
Sn 3.63734599375775 -3.61077423536360 -0.01149031341644  
C 5.41186772815964 -2.82186999897199 0.90691482411587  
C 2.47494244594077 -4.85995985417303 1.28907342584680  
C 3.91534201023036 -4.23291896815565 -2.04613643470644  
H -3.33335404698639 7.25177184013025 -2.54299945526613  
H -7.50593512544450 8.94170372150981 -1.04957931896220  
H -5.33030378231544 8.61534623372133 -2.14778508993703  
H -4.71412024559235 2.60216247034808 0.95185500670705  
H -6.85046280769641 2.94525955190175 2.02083605797130  
H -8.85907515388266 4.32693305343083 2.41131142496529  
H -10.15153014963284 6.39313550278067 1.98920199317100  
H -9.26704746223275 8.12482511661805 0.46409611977779  
H 1.02432863072047 2.76321043569254 -0.28189829111736  
H 2.29408328396091 0.64947148949900 -0.07133970598977  
H -1.11564244784188 -1.53709340403824 -1.44460252603184  
H -2.39821173575112 0.56601527940819 -1.63013032361221  
C -3.46355759664067 4.32114179863604 -0.81275283311021  
H -3.13675040885989 2.26388310306148 -0.14587945024594  
H -2.03788678421089 5.19368481208636 -2.14630671676101  
H 1.71383781684118 -5.38361647106989 0.71444966424655  
H 2.00182098027794 -4.23150490085967 2.04329945640736  
H 3.13281089608820 -5.57849251961765 1.77797837163104  
H 4.06423875628901 -3.34671075271233 -2.66274081210865  
H 3.03793486181441 -4.77761399459344 -2.38860996975421

H 4.79722705599884 -4.87031452380458 -2.11047724422410  
H 5.85284155699372 -2.06639294820042 0.25707449289537  
H 6.13012552106508 -3.62723346953555 1.06238112287262  
H 5.15689259902222 -2.37518773983111 1.86762033729529

**Table S3.** Cartesian coordinates of the structure 2 optimized at the B3LYP/ZORA-def2-TZVP(SARC-ZORA-TZVP) level in water (C-PCM model).

C -4.68871445172990 4.48756145064826 -0.15170860365883  
C -5.39319934433057 5.71999855761825 -0.29878050440116  
C -4.74689609723721 6.85330467652170 -0.86214608130570  
C -3.41080353395171 6.74217633191165 -1.27226170876288  
C -2.73079114152193 5.55443543431775 -1.13203895101993  
C -6.74900361440568 5.82887495802625 0.11576803645897  
C -7.44736824163964 7.05936334469940 -0.02955316085990  
C -6.76330865549083 8.17794101561092 -0.59885503627154  
C -5.47032343226019 8.07762879028592 -0.99716691826468  
C -5.39863057065161 3.37832942783471 0.41595718355457  
C -6.69221199721567 3.48571308467643 0.80946903972185  
C -7.41628695779335 4.70941034489419 0.67803825564173  
C -8.74985024581444 4.83400349402963 1.08096629245901  
C -9.42281932471533 6.04002068334574 0.93614975845444  
C -8.78094862301592 7.14163609875905 0.38714570170603  
C -2.56486020054126 3.19106286005389 -0.44680669631227  
N -1.35800268956999 3.08733003138647 -0.86384787086297  
C -0.69751959257266 1.86114432099758 -0.76456615717991  
C 0.67007029843749 1.87082056560816 -0.46071003286409  
C 1.37654684816566 0.68638251032038 -0.36179849626343

C 0.74075219649602 -0.53790192064860 -0.58859751974656  
C -0.61608802577097 -0.54862090498700 -0.91967895350511  
C -1.32966193710171 0.63258213354441 -1.01010677483225  
C 1.47907102725910 -1.81930813385842 -0.49722137309303  
O 0.93402776739646 -2.91414405266175 -0.66533437637425  
O 2.75586406631261 -1.73433827621025 -0.22312533233860  
Sn 3.55835981100936 -3.67014702444306 -0.12554453298628  
C 5.57373811794651 -3.06603475648183 0.30152301963711  
C 2.71039411651372 -4.67871856711746 1.55938380361299  
C 3.45458988640830 -4.58836860412378 -2.05547338532670  
C 1.47916995698739 -5.33433378285316 1.48928792929386  
C 0.97372087870205 -6.00055556405577 2.60068033812657  
C 1.69252064206441 -6.01639138411866 3.79269400989348  
C 2.91918246296194 -5.36642896514403 3.87112418683244  
C 3.42699438481120 -4.70262760572232 2.75752961197686  
C 6.54221906346702 -4.03403436340521 0.58087187021451  
C 7.85628830619538 -3.66625062990437 0.85399351066436  
C 8.21731303876015 -2.32280287919599 0.84972527799490  
C 7.26189821714704 -1.35067231975099 0.57196096897537  
C 5.94774516451535 -1.72056339901650 0.29933863954435  
C 2.27955315503580 -5.15730698304783 -2.55164636694170  
C 2.27137665727413 -5.77927781442836 -3.79573735110263  
C 3.43586679834493 -5.83751806497219 -4.55614799166365  
C 4.61004281388331 -5.27377895229346 -4.06963089171526  
C 4.61934431476957 -4.65389738624200 -2.82293324228576  
H -2.91745403611709 7.60617946832224 -1.70071526947081  
H -7.30212984123836 9.11187179786085 -0.70636661656646

H -4.95885549354054 8.92976936050079 -1.42845079200372  
H -4.90359922615993 2.42626966999091 0.53486586440388  
H -7.20167230526749 2.62911677260898 1.23478084589295  
H -9.25315969411972 3.97535775647499 1.50901479679213  
H -10.45501623574132 6.12166200830491 1.25306415842576  
H -9.30927781923797 8.08082545765188 0.27527216347719  
H 1.16091460700152 2.82097649753589 -0.29332821335031  
H 2.42816147669282 0.70340577825917 -0.11241772133693  
H -1.10466165369518 -1.49393006803440 -1.11351314302743  
H -2.37319354508739 0.61308012812210 -1.29594171799451  
H 0.90384424067980 -5.31971327436724 0.57303223752632  
H 0.01752278470008 -6.50588568027986 2.53710190756864  
H 1.29647435243359 -6.53392067037211 4.65788948465278  
H 3.48189352525228 -5.37548257999846 4.79675925914465  
H 4.38602034625251 -4.20351686964428 2.83362960359273  
H 6.28206115371004 -5.08696059108172 0.58956044012975  
H 8.59629056448999 -4.42757910180676 1.06950624288403  
H 9.23964437355279 -2.03467073627966 1.06210227322706  
H 7.53889251335149 -0.30319805678656 0.56743102464386  
H 5.21595285710746 -0.95165296300998 0.08537409163259  
H 1.36488564159059 -5.10753878797724 -1.97647154263877  
H 1.35507975443284 -6.21766537901214 -4.17253860853823  
H 3.42694344595095 -6.32067162913356 -5.52554539513355  
H 5.51864555486698 -5.31560892170708 -4.65802491854592  
H 5.54315943214449 -4.22198036449388 -2.45590711084546  
C -3.33819344198710 4.41872864565177 -0.57682624693783  
H -3.04409886778097 2.34484520819305 0.04415038567630

H -1.69941577777146 5.48061934409970 -1.44773660810489
